# Supplementary material for: Toxicity of Difenoconazole and Atrazine and Their Photodegradation Products on Aquatic Biota: Environmental Implications in Countries Lacking Good Agricultural Practices
Source: MDPI journal article supplement (doi:10.3390/toxics11030213), 2023-02-24
Supplement: s1 [file s1]

# Supplementary Materials: Toxicity of Difenoconazole and Atrazine and Their Photodegradation Products on Aquatic Biota: Environmental Implications in Countries Lacking Good Agricultural Practices

Julia Mendieta Herrera, Carlos Iñiguez Armijos, Daniel Rosado Alcarria and Silvio Aguilar Ramírez

**Table S1.** Formulation for Lemna minor nutrient solution according to Standard Methods 8211 [11]. A, B, and C refers to the stock solution to be prepared.

| Solution                                             | Stock Solution Concentration |
|------------------------------------------------------|------------------------------|
| <b>A:</b>                                            |                              |
| NaNO <sub>3</sub>                                    | 25.5 g/L                     |
| NaHCO <sub>3</sub>                                   | 15.0 g/L                     |
| K <sub>2</sub> HPO <sub>4</sub>                      | 1.04 g/L                     |
| <b>B:</b>                                            |                              |
| CaCl <sub>2</sub> · 2H <sub>2</sub> O                | 4.41 g/L                     |
| MgCl <sub>2</sub>                                    | 5.7 g/L                      |
| FeCl <sub>3</sub>                                    | 0.096 g/L                    |
| Na <sub>2</sub> EDTA · 2H <sub>2</sub> O             | 0.3 g/L                      |
| MnCl <sub>2</sub>                                    | 0.264 g/L                    |
| <b>C:</b>                                            |                              |
| MgSO <sub>4</sub> · 7H <sub>2</sub> O                | 14.7 g/L                     |
| H <sub>3</sub> BO <sub>3</sub>                       | 0.186 g/L                    |
| Na <sub>2</sub> MoO <sub>4</sub> · 2H <sub>2</sub> O | 7.26 mg/L                    |
| ZnCl <sub>2</sub>                                    | 3.27 mg/L                    |
| CoCl <sub>2</sub>                                    | 0.78 mg/L                    |
| CuCl <sub>2</sub>                                    | 0.009 mg/L                   |

To prepare this nutrient solution, add 1mL of each stock solution to 100 mL deionized water. Adjust to pH 7.5 – 8.0.

**Table S2.** Formulation for preparing reconstituted freshwater for Daphnia magna according to Standard Methods 8010:I [11].

| Water Type      | Salts Required in mg/L |                                       |                   |      | Water quality |                                  |                                    |
|-----------------|------------------------|---------------------------------------|-------------------|------|---------------|----------------------------------|------------------------------------|
|                 | NaHCO <sub>3</sub>     | CaSO <sub>4</sub> · 2H <sub>2</sub> O | MgSO <sub>4</sub> | KCl  | pH            | Hardness mg CaCO <sub>3</sub> /L | Alkalinity mg CaCO <sub>3</sub> /L |
| Very soft       | 12                     | 7.5                                   | 7.5               | 0.5  | 6.4 - 6.8     | 10-13                            | 10-13                              |
| Soft            | 48                     | 30                                    | 30                | 2.0  | 7.2 - 7.6     | 40-48                            | 30-35                              |
| Moderately hard | 96                     | 60                                    | 60                | 4.0  | 7.4 - 7.8     | 80-100                           | 60-70                              |
| Hard            | 192                    | 120                                   | 120               | 8.0  | 7.6 - 8.0     | 160-180                          | 110-120                            |
| Very hard       | 384                    | 240                                   | 240               | 16.0 | 8.0 - 8.4     | 280-320                          | 225-245                            |

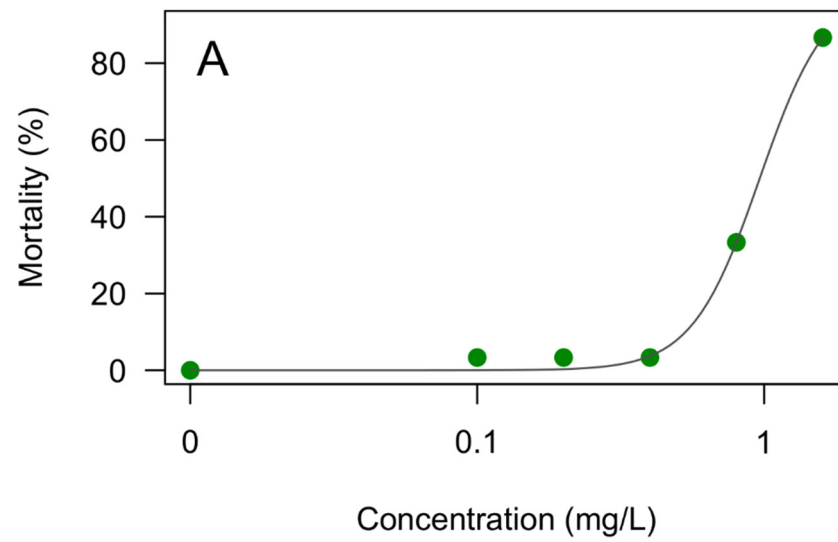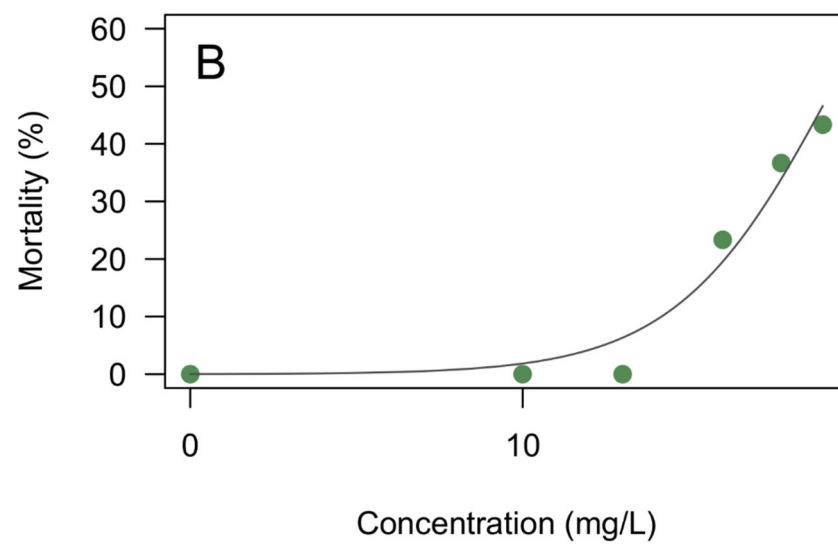

**Figure S1.** Dose-response relationships between the percentage of mortality of *Daphnia magna* neonates and the concentration of difenoconazole (A) and atrazine (B).
